# Supplementary material for: Effect of ocean acidification and elevated temperature on growth of calcifying tubeworm shells ( Spirorbis spirorbis ): An in-situ benthocosm approach
Source: Copernicus journal article supplement (doi:10.5194/bg-2017-185), 2017-07-07
Supplement: Supplementary file [file bg-2017-185-AC2-supplement.pdf]

We thank the reviewer for her supportive comments and the constructive review of our manuscript. Below we respond to the reviewer's specific comments.

**Reviewer general comment 1:** This work suggested a seasonal trend of calcification related to maximum irradiance and the respective response to ocean acidification. Unfortunately, these seasonal observations were not replicated and should be interpreted with caution.

**Response G1:** It is correct that we suggested, based on our data, a seasonal trend in *Spirorbis* growth rates. It is well visible in our Fig. 14 with highest average growth rates in the summer and autumn experiments declining to lowest growth in the spring experiment. However, we do not suggest that this trend is related to irradiance or acidification. If this were the case we would expect the highest growth rates in experiments with highest pH/saturation state. On the contrary, we observe high growth rates in autumn coinciding with very low irradiance and lowest pH (see attached Figure 1, i.e. revised Fig. 3 of the manuscript). In fact, the lowest mean growth rate was observed in spring when saturation state was the highest of all experiments and irradiance was intermediate (Figure 1). In addition, our experiments with elevated pCO<sub>2</sub> show no significant influence of acidification on growth rates.

Further, as shown in Fig. 12 of the manuscript, growth strongly depends on the size of the worm tubes, i.e. on the ontogenetic status of the worm. Small (juvenile) worms show highest growth rates. Rates generally decrease with increasing age and size. The dominance of juveniles in summer and autumn is responsible for the high growth rates in these experiments, despite a very low saturation state and low light conditions in autumn.

Our conclusion with respect to growth rates therefore is that growth patterns are dominantly controlled by ontogenesis (genetically controlled) and only modified by external parameters. We nevertheless agree that the lack of multi-annual data and seasonal replicates in our experiments limits our interpretations concerning seasonal impacts on *Spirorbis* growth.

To more clearly point out these limitations we will change the title of Section 3.5.2 to “Differences between seasonal experiments” and add the following text to Section 4:

As shown in Figs. 3 and S2 there was strong intra- and inter-experimental variability in several environmental parameters, most prominently temperature, insolation, pH and saturation state, but also salinity and nutrient availability. Further, food supply and faunal/floral composition varied during the experiments as discussed below (Section 4.5) and shown in Werner et al. (2016). This natural variability is an intentional part of the benthic mesocosm set-up as it allows to consider the dynamics of benthic communities reacting to environmental changes under near-natural boundary conditions (Wahl et al., 2015, 2016). On the other hand, the lack of control on several environmental parameters also has drawbacks for the interpretation, comparability and reproducibility of results from different seasonal experiments. As described in Section 2.3, we use the term “seasonal factors” to collectively describe variations of experimental conditions between the four experiments, including environmental parameters and the ontogenetic development of *S. spirorbis*. While some of these factors are clearly dominated by seasonal change (e.g. light, temperature), others may vary on different time scales. Without multi-annual replicates we can not prove the seasonal nature of the observed changes in *S. spirorbis* growth between the four experiments. We therefore use the term “seasonal” as a simplifying descriptor of inter-experimental changes, although their seasonal nature needs to be verified in future multi-annual experiments.

**Reviewer major comment 1:** The current statistical approach is prone to misleading conclusions on the effects of season and treatments.

- The lack of sound independently replicated seasonal experiments limits possible conclusions.
- Approach in statistical analysis may overestimate the treatment effects from oversampling

pseudo-replicates.

The authors should carefully modify their interpretations and make sure that their observations are supported by sound statistics.

**Response M1:** As stated above, we agree that without independently replicated seasonal experiments we cannot conclude that differences observed between our 4 experiments (spring, summer, autumn, winter) have a truly seasonal nature. This means that we can only show that differences between experiments are statistically significant, but we cannot say whether the same differences would occur in the same way in subsequent years (see Response G1).

On the other hand, treatment effects (effects of changed pCO<sub>2</sub> and/or temperature) were not compared between seasons. In the statistical analysis (three-way ANOVA) we included “season” as the third factor (in addition to T and CO<sub>2</sub>) for the analysis, but interpretation and Tukey's HSD tests did not include the factor “season”. Comparisons were carried out only between different treatments within a single season, using the median value of three replicated basins. All replicates used for interpretations (three independent basins for each of the four treatment conditions: control, +T, +CO<sub>2</sub>, +T+CO<sub>2</sub>) are true, independent replicates. As one exception (Section 3.5.2, last paragraph) we used three-way ANOVA to compare treatment influences on growth of the adult populations in the winter and autumn experiments. However, the results showed only insignificant differences ( $p > 0.67$ ).

In all other cases interpretations of differences between the seasonal experiments, as described in Response G1, do not include these treatment effects. Consequently Fig. 14 only indicates the significant difference between treatments within a single season, while the much larger differences between seasonal experiments are not statistically tested. We interpret the latter as dominantly reflecting ontogenetic growth histories.

To better describe the statistical methods applied in our analysis we will modify the last paragraph of Section 2.3 as follows:

Three-, two-, one-way ANOVA and Tukey's HSD tests were used for testing statistical significance of differences between the median values from different treatments and seasons. Each treatment had three replicates but, with a total duration of one year, seasonal experiments were not replicated. Median values were calculated for each of the treatment replicates based on the measured values, resulting in 12 basin medians for every seasonal experiment. In the three-way ANOVA, the three factors were temperature, pCO<sub>2</sub> and season. The temperature and pCO<sub>2</sub> factors had two levels, elevated and ambient. It should be kept in mind that the season factor here is a multiple factor which includes a range of parameters/conditions such as fjord temperature, pH, saturation state, nutrients and ontogenetic effects of *S. spirorbis*. Only differences caused by the temperature and pCO<sub>2</sub> offsets between the treatments were tested for statistical significance. The “seasonal” factor had no independent (multi-annual) replicates. Differences between seasonal experiments may consequently arise from any of the above mentioned seasonal factors, as well as from other unknown factors.

Assumption of normality of the models' residuals and homogeneity of 10 residual variances were tested with Shapiro-Wilk's tests and box plots, respectively. Statistical analyses were conducted with R (Version 3.2, [cran.r-project.org](http://cran.r-project.org)), PAST (Version 3.13, Hammer et al., 2001) and Microsoft Excel (Data Analysis Tool). A probability value of  $< 0.05$  was considered significant.

**Reviewer major comment 2:** This work has only studied one year to understand potential seasonal impacts, however, authors tried to make a conclusion on seasonal impacts (i.e. Spring, Summer, Autumn, Winter) on the observed responses. This is not appropriate unless there were more than 3 years of observation to make each of spring, summer, autumn, and winter to have 3 independent and random observation. The authors are reminded that any seasonal effect observed is a suggestive trend for future experiments.

**Response M2:** We agree that it would be helpful to investigate seasons in more than a one year campaign. However, since the in-situ mesocosms are dealing with natural fluctuations 3 following years do not really mean that they represent true 'replicates'. They may differ in boundary conditions. In our delta approach (Wahl et al., 2015), by carefully comparing un-biased with manipulated experiments, we obtain information about the impact of changing T, pCO<sub>2</sub> and T+pCO<sub>2</sub>. In addition we observe seasonal and biogeochemically well characterized variations between our experiments (Spring, Summer, Autumn, Winter). However, the 'seasonal effect' we show here includes a range of different factors such as light, food, size, generations, that may also affect the growth rate, but are not included in the experimental settings (no repeats), that's why we actually focus on comparing the treatment parameters within one season, but not between seasons (e.g. Fig. 14).

Nevertheless, as we show in our manuscript, the very strong seasonal cycle of temperature and insolation and its impact on biological systems in the Baltic Sea needs to be considered for interpreting growth conditions of *Spirorbis*. The reproduction cycles of *Spirorbis* are well documented in the literature and are known to follow a seasonal timing (see Section 4.2). Therefore, neglecting seasonal information in our data would lead to misinterpretations. Accordingly, seasonal impacts have been described in several publications about different aspects of the same benthocosm experiments, e.g. Raddatz et al. (2017), Werner et al. (2016), Graiff et al. (2015), Al-Janabi et al. (2016, Mar. Biol., 163, 14). As explained in Responses G1 and M1 we will add notes of caution about the significance and interpretation of differences between the seasonal experiments in Sections 2.3 and 4.

**Reviewer major comment 3:** The interpretation of the result is not appropriate. The experiment is designed to appropriately answer whether there were effects by the 4 levels of treatment (ambient, pCO<sub>2</sub>, +T, and pCO<sub>2</sub>+T), each benthocosm served as independent replicates for statistical analysis. HOWEVER, samples taken within the samples mesocosm are NOT independent replicates. I suggest the authors take the average value for every parameter they measure as the value in each replicate and perform 2-way ANOVA or appropriate statistical test, take n=3. Over-sampling and pseudoreplication may lead to an overemphasis of the effects of treatment effects.

**Response M3:** We agree that individual worm tubes from a basin are not independent replicates when evaluating treatment effects. Indeed, we used the median value of each basin for statistical analyses (ANOVA), i.e. n=3 for every treatment. This is explained in Section 2.3 (see Response M1 for an improved version of Section 2.3).

**Reviewer major comment 4:** It is important to address a more general theory how calcifiers may benefit from the presence of photosynthetic activities of macroalgae in the other ecosystems.

**Response M4:** In our manuscript we describe the potential impact of pH changes in the algal boundary layer. Other effects of algal activities were beyond the scope of our study.

**Reviewer major comment 5:** The impact of pCO<sub>2</sub> on the photosynthetic activity of *Fucus* is also an important point of discussion. Here are a few studies which are relevant to this topic of discussion.

**Response M5:** The impact of elevated pCO<sub>2</sub> on *Fucus* in the same experiments was studied by our colleagues and is published in Graiff et al. (2015, *Frontiers in Marine Science* 2, 00112, doi: 10.3389/fmars.2015.00112). We thank the reviewer for the two additional references, especially for the paper of Raddatz et al., which we will add to our manuscript. The increased anti-fouling

activities of *Fucus* in the elevated temperature summer experiments may have contributed to the high *Spirorbis* mortality in these treatments (line 3 of Section 4.4).

We agree that discussing pCO<sub>2</sub> impacts is important for interpretations concerning the *Fucus* ecosystem (see Graiff et al., 2015). However, we saw no significant impact of pCO<sub>2</sub> of *S. spirorbis* tube growth. Therefore discussing impacts of elevated pCO<sub>2</sub> on *Fucus* algae and their consequences for *Spirorbis* growth would be rather speculative.

**Reviewer detailed comment 1:** Figure 5A, 12, 13, and 15, should be removed or plotted again after inappropriate interpretation of seasonal response and pseudoreplication are eliminated.

**Response D1:** We do not agree with the reviewer. All of these figures show important information. Figure 5A shows the size distribution of all analysed *Spirorbis* tubes from all experiments. It shows that there were systematic size differences between the four experiments. The latter are color coded to show these differences. This is very important for the interpretation of the growth data, because growth strongly depends on tube size, as is shown in Fig. 12. There is no statistical evaluation or significance test in Figure 5A. The differences in size distributions between the seasonal experiments are mainly reflecting the ontogenetic evolution and reproduction cycles of *S. spirorbis*. As discussed in Section 4.2 the seasonal and episodic nature of *Spirorbis* reproduction is well documented in the literature, which justifies our interpretation.

Figure 12 shows a general relationship between the initial worm tube diameter and tube growth. We conclude from this relationship that growth is primarily limited by ontogenesis. The dependence is valid for all specimens of all our experiments, regardless of season or treatments. Therefore using  $n=2783$  for the linear fit in Fig. 12 is correct. As in Figure 5 we added color coding and average values to show that initial size distributions and growth differed systematically between the different experiments (seasons). This is very important for the data interpretation. In our opinion it primarily reflects the seasonally controlled life cycle (reproduction and ontogenesis) of *S. spirorbis*. We do not draw conclusions about impacts of acidification or warming from them (see also Response G1).

Figure 13 shows a dependence of shell weight on saturation state. There was a significant positive correlation in the spring and autumn experiments. However, it also shows that an additional factor had a strong impact on weight increase. Weight increase was similar in the spring and autumn experiments although in spring the water was oversaturated while in autumn it was undersaturated with respect to *Spirorbis* Mg-calcite. Very likely this additional factor is again related to the ontogenetic development of the worms.

Figure 15 compares growth in juvenile populations from different experiments (summer and autumn). As stated in Response G1 we can not prove that the observed differences are truly seasonal and would be similar between summer and autumn if repeated in subsequent years. However, the differences between the two compared experiments are statistically significant and each experiment had three independent replicates (control treatments, 3 basins).

**Reviewer detailed comment 2:** Page 6 Line 2 This selection of subpopulation needs to be further justified.

**Response D2:** Growth of *Spirorbis* tubes depends strongly on the initial diameter (see Figure 12). Therefore, it is essential to compare populations with similar initial diameters if differences in growth in different treatments are to be detected. We therefore analysed only a subset of data from the two experiments, for which the initial diameters ( $D_i$ ) were in a similar range. We will change the sentence on page 6, line 2-3:

In order to derive comparable populations with similar  $D_i$  in the summer and autumn-small data

we selected sub-populations that had similar  $D_i$  ranges and similar median  $D_i$  values. Tubes outside this  $D_i$  range were not used in the statistical analysis.

**Reviewer detailed comment 3:** Page 12 Line 5-9 how did the researcher ensure the growth measurement of broken and strongly damaged tubes was accurate?

**Response D3:** Broken and strongly damaged specimens from the summer experiments with elevated temperatures were not analysed (e.g., see Fig. 14, Table 2). In other experiments shells were mostly intact. Broken or damaged tubes were not measured (e.g., indicated by “no data” in Figure 14).

**Reviewer detailed comment 4:** Page 4 Line 23 How to quantify the volume of the blades, what has been done to ensure they are similar volume? How many worms were present in each replicate tank?

**Response D4:** Individual Fucus plants were selected by visual inspection to contain approximately the same volume of blades and similar amounts of Spirorbis. That means that plants of similar sizes and with similar numbers of blades were collected. However, it is not possible to collect 12 identical Fucus plants in a natural environment.

Typical densities of Spirorbis tubes at the start of the experiments is shown in Fig. 1. Average starting populations were on the order of 100-200 specimens per tank.

We will add this information to Section 2.1.

**Reviewer detailed comment 5:** Page 4 Line 26-27 provide the size/ volume of the boxes and duration of staining, at what density were the animal kept in the staining solution? Was the pH value before and after the staining monitored? Please provide this information for repeatability.

**Response D5:** The twelve Fucus thalli with attached Spirorbis collected for each experiment were stained in a 10 L transparent plastic box for three days. We did not measure pH during staining, as the box was continuously bubbled with ambient air to keep pH stable. The pH of the seawater used for staining varied from about 7.7 in autumn to 8.5 in spring. We added 0.3 L of calcein solution adjusted to a pH of 8.1, thereby altering the seawater insignificantly by less than 0.01 pH units. We will add the box volume in Section 2.2.

**Reviewer detailed comment 6:** Page 6 Line 2 provide statistics for the difference

**Response D6:** Will be added: ...medians differed significantly (two-way ANOVA,  $p=0.019$ ).

**Reviewer detailed comment 7:** Page 6 Line 16 list polishing materials and duration for reproducibility

**Response D7:** We will add to Section 2.4:

Samples were wet polished with grinding paper followed by polishing solutions of 9  $\mu\text{m}$ , 3  $\mu\text{m}$  and 1  $\mu\text{m}$  grain size until no more scratches were visible on the polished surface.

**Reviewer detailed comment 8:** Page 6 Line 21 please provide excitation and emission wavelength, and resolution of images acquired

**Response D8:** Images were recorded with a resolution of 1360\*1024 pixels. Excitation wavelength was 495 nm. Emission (517 nm) from calcein was recorded. This information will be added in Section 2.4.

**Reviewer detailed comment 9:** Page 6 Line 27 pH calibration was at the lower range (pH 4 and pH 6.865), this requires extrapolation when measuring the ocean pH at 7.4-8.0. it is recommended to check the accuracy of this approach with another meter that has been calibrated by 3 points (for example pH 4, 7 10)

**Response D9:** The field measurements were conducted in this study with 2 NBS calibration solutions kept at in-situ temperature. The pH 9/10 buffer was avoided to prevent impact of possible CO<sub>2</sub> contamination under field conditions. The stability of the electrodes' Nernst slope and the applicability of the 2-point calibration to higher pH was previously tested by the measurement of a pH 9 calibration solution. Independently calculated pH values (with CO<sub>2</sub>sys) based on measured dissolved inorganic carbon and total alkalinity values showed good agreement with the measured pH in the range between 8 to 9 (Wahl et al., 2015; Limnol. Oceanogr. Meth.). We will add this to Section 2.5.

**Reviewer detailed comment 10:** Page 6 Line 31, what is the importance of filtering and adding NaCl to TA samples? Please supplement the reason.

**Response D10:**

Filtering is necessary to remove microbes and particles that could alter the sample TA. Filtering does not alter the TA value. NaCl was added to adjust the ionic strength of the acid used in the titration procedure to avoid changes in ionic strength during analysis. Information will be added to Section 2.5.

**Reviewer detailed comment 11:** Page 7 Line 1 should it be "Both DIC and TA measurements are calibrated. . ."?

**Response D11:** Yes, standards were used for both parameters. We will add: ... for DIC and TA.

**Reviewer detailed comment 12:** Page 7 Line 13 what was the technique used for measuring Ca Si and P?

**Response D12:** We will add:

The dissolved concentrations of Si, P and Ca were analysed by inductively-coupled plasma optical emission spectrometry (iCAP 6300 DUO, Thermo Fisher Scientific) after appropriate dilution. The accuracy and precision was routinely checked with the certified seawater standard CASS-5 as previously described (Kowalski et al., 2012, Est. Coast. Shelf Sci 100). PO<sub>4</sub> was also measured by spectrophotometry using a QuAAtro nutrient analyser (SEAL Analytical; Winde et al. 2014; J Mar Sys). Accuracy and precision checked by replicate analyses of a solution from powdered phosphate salts were better than 8% RSD.

**Reviewer detailed comment 13:** Page 9 Line 6-21 The use of adult and juvenile is not appropriate if the literature shows that sexual maturity begins at 1.9 m. Authors are recommended to use neutral words such as small and large cohort/ young and old cohort

**Response D13:** We agree that using the term “adult” is problematic, as the selected size range may include juvenile specimens. We will replace the terms by “small” and “large”, where appropriate.

**Reviewer detailed comment 14:** Page 9 Line 22-29 Please explain the use of "mode" instead of "mean"

**Response D14:** In this paragraph we describe the most common sizes of the different Spirorbis populations. This is correctly described by the population mode, not by the mean. The statistical term “mode” describes the most frequently occurring class in a distribution, which can differ significantly from the mean in skewed or non-normal distributions. The modes of the populations can easily be identified in Figure 5.

**Reviewer detailed comment 15:** Page 10 Line 15 Please reword and clarify the meaning of this line

**Response D15:** “The sentence will be changed to: “The newly grown lamellae cover a large area along the inner tube wall surface, while little new material is attached to the outer tube wall surface.”

**Reviewer detailed comment 16:** Page 10 Line 21 "Tube opening" not "tube mouth"

**Response D16:** Will be changed.

**Reviewer detailed comment 17:** Page 10 Line 24 and Figure 10 Please provide sample size that supports this percentage measurements

**Response D17:**[see comment D26 for Table 2]

**Reviewer detailed comment 18:** Page 12 Line 23 to Page 13 Line 6 The seasonal effects is not supported by independent replication.

**Response D18:** We agree with the reviewer that without independently replicated seasonal experiments we cannot conclude that differences observed between our 4 experiments (spring, summer, autumn, winter) have a truly seasonal nature (see Response G1, M1, M2). As noted above we will change the title of Section 3.5.2 to “Differences between seasonal experiments” and add text to more clearly point out these limitations.  
As discussed in Section 4.2 of our manuscript, the seasonal nature of Spirorbis reproduction is well-documented in the literature. So our interpretation of the observed ontogenetic differences as being seasonal is justified.

**Reviewer detailed comment 19:** Figure 1 please add arrows to show juvenile and adults

**Reviewer detailed comment 20:** Figure 2 Please make the font bigger

**Reviewer detailed comment 21:** Figure 7 Please improve the font choice for "Growth direction" and " Tube wall inner surface", it is not easy to read

**Reviewer detailed comment 22:** Figure 8 The labels for the longitudinal section and the cross section are mixed up, note that longitudinal section is the cut made along the long axis of the tube.

**Reviewer detailed comment 23:** Figure 9b - please added annotation to indicate the microboring structures as mentioned in Page 11 Line 12

**Response D19-23:** Figures will be changed.

**Reviewer detailed comment 24:** Figure 12 use of red triangle and red circle makes the pattern hard to see, n=2783 is an example of pseudoreplication, please re-examine the result and make a new plot

**Response D24:** Please note that n=2783 is not the number of replicated treatments but the number of specimens used in our data set. The trend line describes the general dependence of growth on initial diameter, which is independent of the treatments in our experiments. Our interpretation for this trend is the ontogenetically controlled growth behaviour of *Spirorbis*, which is of course in sync with the seasons, but NOT with calcite saturation or pH.

We will change the colors of the symbols. The autumn-big triangles were supposed to be brown, but rather look red in the PDF.

**Reviewer detailed comment 25:** Figure 16 fonts for the scale bar are too small

**Response D25:** Figure will be changed.

**Reviewer detailed comment 26:** Table 2 - was is the total number of worms sampled for this percentage? Please provide the numbers by expanding the table.

**Response D26:** Expanded Table 2 is attached.

#### **Typos:**

Page 4 Line 9 "In this area," comma is missing

Page 5 Line 11 "In total,"

Page 7 Line 33 it is clearer to say " with respect to *S. spirorbis* tube Mg-calcite"

**Response:** Thank you! Typos will be corrected.
